# Supplementary material for: Diastolic Left Ventricular Function in Relation to Urinary and Serum Collagen Biomarkers in a General Population
Source: PLoS One. 2016 Dec 13;11(12):e0167582. doi: 10.1371/journal.pone.0167582 (PMC5154519; doi:10.1371/journal.pone.0167582)
Supplement: S3 Table — (DOC) [file pone.0167582.s003.doc]

**S3 Table.**

**Covariables selected by stepwise regression**

| Covariables |  | E peak | A peak | E/A | e’ | a’ | e’/a’ | E/e’ |
| --- | --- | --- | --- | --- | --- | --- | --- | --- |
| R2 |  | 0.27 | 0.58 | 0.66 | 0.75 | 0.49 | 0.73 | 0.46 |
| Female sex (0,1) |  | 8.66§ | 5.82§ | 0.05† | … | –0.88§ | 0.09‡ | 1.11§ |
| Age (+15.5 yrs) |  | –6.56§ | 10.0§ | –0.33§ | –2.41§ | 1.26§ | –0.46§ | 0.80§ |
| Body mass index (+4.2 kg/m2) |  | … | 2.82§ | –0.07§ | –0.65§ | 0.35§ | –0.14§ | 0.30§ |
| Mean arterial pressure (+10.7 mm Hg ) |  | … | 2.14§ | –0.02† | –0.32§ | … | –0.03† | 0.32§ |
| Heart rate (+9.7 bpm) |  | –3.15§ | 3.62§ | –0.14§ | –0.25§ | 0.68§ | –0.12§ | –0.12* |
| Serum creatinine (+15.4 mol/L) |  | … | … | 0.02* | 0.14† | … | … | … |
| Total cholesterol (+0.97 mmol/L) |  | … | … | –0.03‡ | –0.19‡ | 0.16‡ | –0.06§ | … |
| Log −glutamyltransferase ( 2) |  | –0.96* | –0.76* | … | –0.26‡ | 0.15† | –0.04† | … |
| Fasting plasma glucose (+0.79 mmol/L) |  | … | … | … | … | … | … | 0.09* |
| LVMI (+21.9 g/m2) |  | … | … | … | –0.27§ | –0.20‡ | … | 0.32§ |
| On treatment with diuretics (0,1) |  | … | … | … | –0.41* | –0.45† | … | 0.51† |
| On treatment with -blockers (0,1) |  | … | 1.94* | –0.07† | –0.60‡ | –0.75§ | … | 0.41† |
| On treatment with RAAS inhibitors (0,1) |  | –3.40* | … | … | … | … | … | –0.39* |

The variables considered for entry into the models included sex, age, body mass index, mean arterial pressure, heart rate, serum total cholesterol, ‑glutamyltransferase (as index of alcohol intake) and creatinine, fasting plasma glucose, LVMI, and treatment with diuretics (thiazides, loop diuretics and aldosterone antagonists), ‑ blockers, inhibitors of the renin-angiotensin system (angiotensin-converting enzyme inhibitors or angiotensin type‑1 receptor blockers), and vasodilators (calcium channel blockers and ‑blockers). *P*‑values for variables to enter and stay in the regression models were set at 0.15. Significance of the association: * 0.05<*p*≤0.15; † *p*≤ 0.05; ‡ *p*≤ 0.01; § *p*≤ 0.001.
